# Supplementary material for: How accurate is clinical prognostication by oncologists during routine practice in a general hospital and can it be improved by a specific prognosis training programme: a prospective interventional study
Source: HighWire-hosted journal article supplement (doi:10.1136/bmjopen-2023-081661), 2024-06-01

### Supplementary file 1: Overview of the study procedure

Participating physicians in all 3 phases: 4 residents, 7 oncologists (> 10 PE: 3 residents, 5 oncologists)

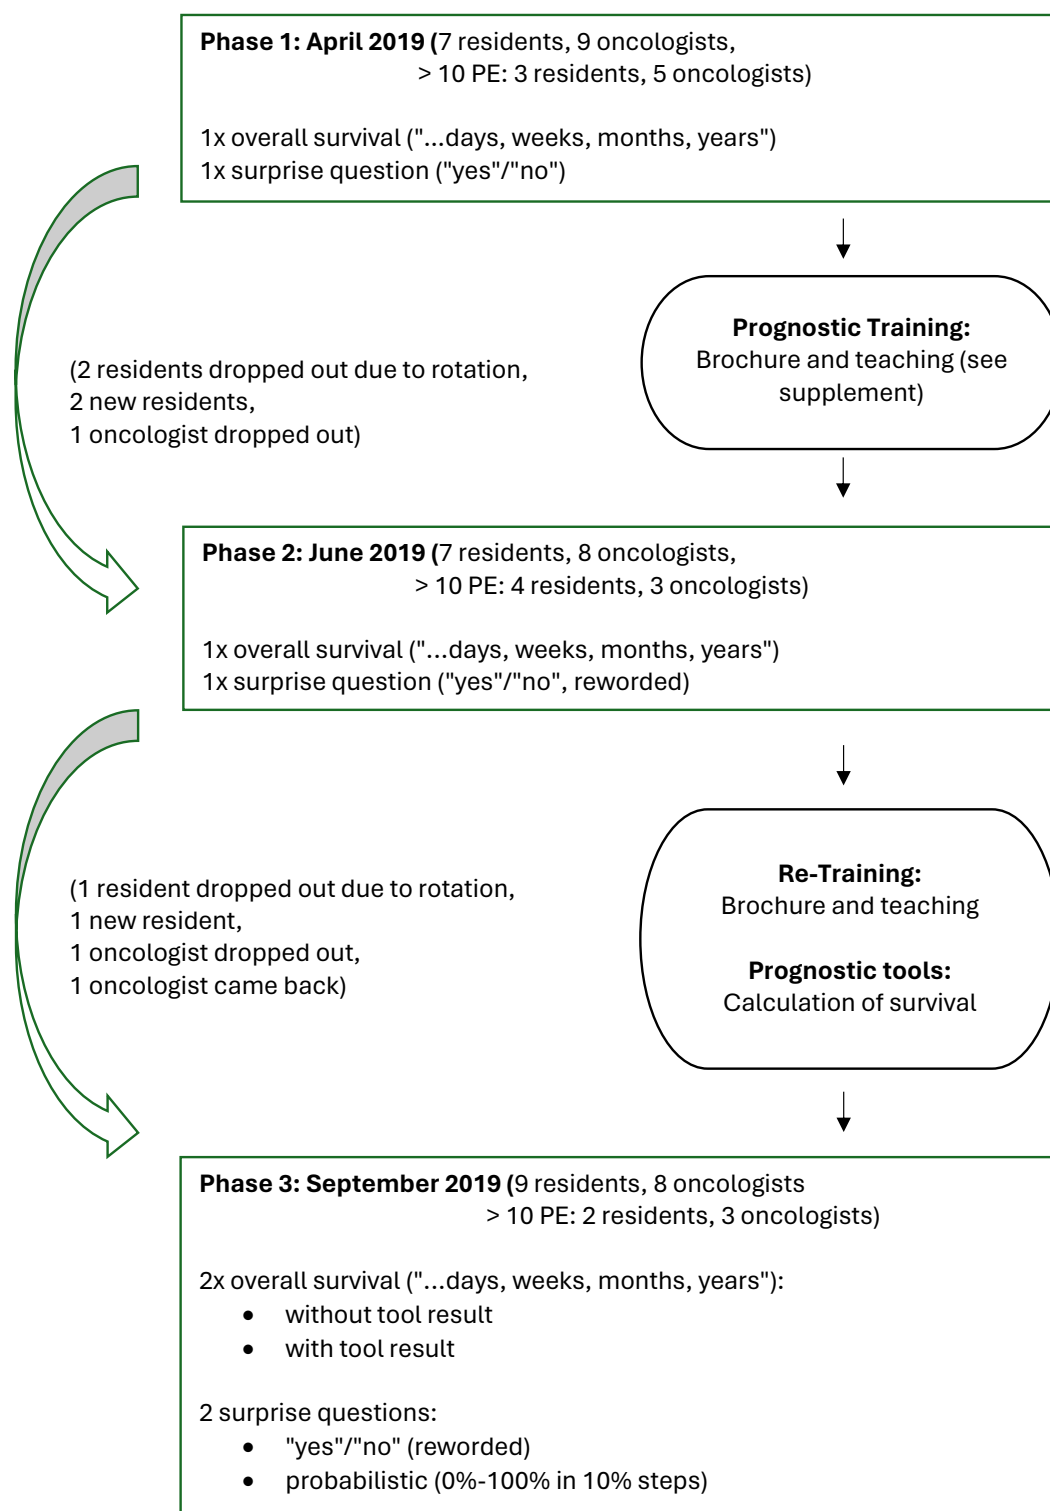

Supplement: bmjopen-2023-081661supp001_data_supplement.pdf [file bmjopen-2023-081661supp001_data_supplement.pdf]
